# Supplementary material for: ZnAl–LDH/MOF-5 heterostructure nanocomposite for photocatalytic degradation of organic dyes under sunlight irradiation
Source: Royal Society of Chemistry journal article supplement (doi:10.1039/d2nj04424b), 2022-12-12
Supplement: d2nj04424b1.pdf [file d2nj04424b1.pdf]

## ZnAl-LDH/MOF-5 heterostructure nanocomposite for photocatalytic degradation of organic dye under sunlight irradiation

Anindita Chakraborty and Himadri Acharya\*

Centre for Soft Matters, Department of Chemistry, Assam University, Silchar-788011, Assam, India.

*E-mail:* [himadriau@yahoo.co.in](mailto:himadriau@yahoo.co.in); *Fax:* +91 3842 270802; *Tel:* +91 3842 270848

Supporting information for this article can be found under <http://dx.doi.org/>

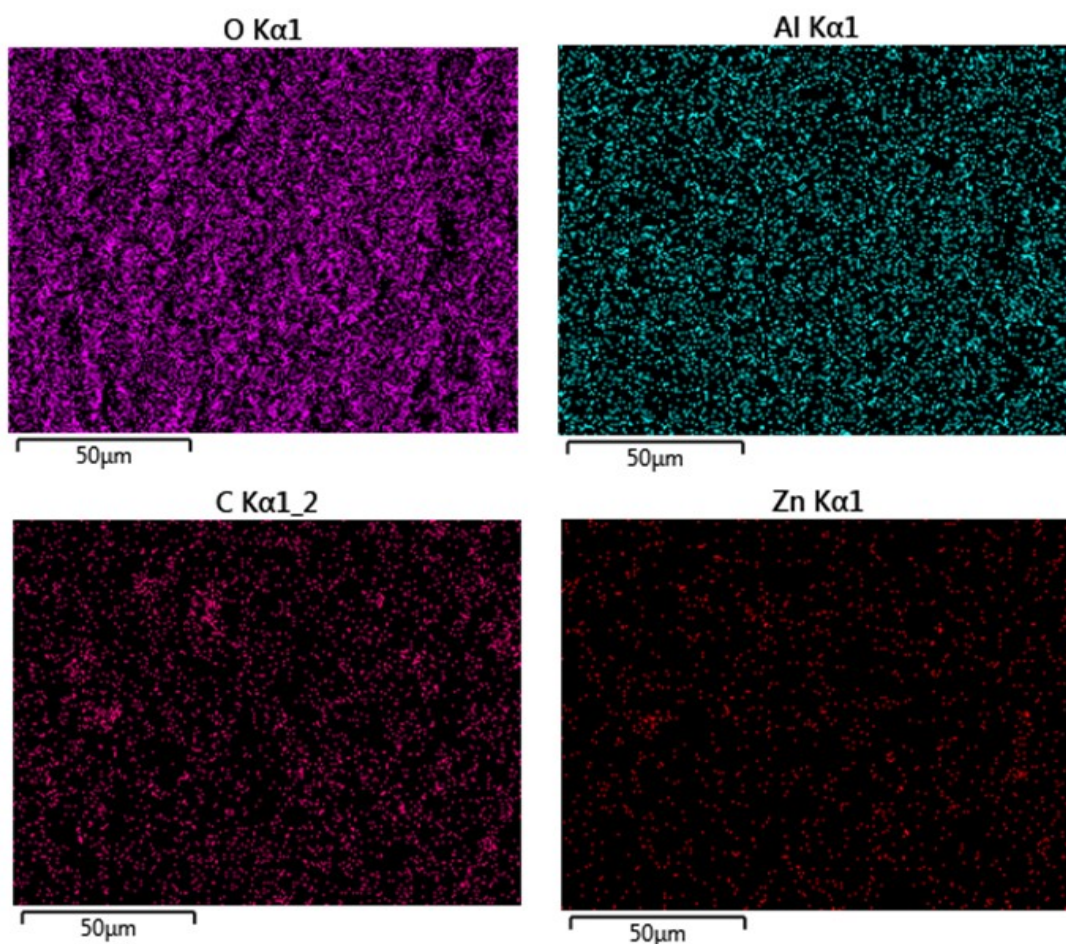

**Fig. S1.** Energy Dispersive X-Ray Spectroscopy (EDS) elemental mapping analysis of ZnAl-LDH/MOF-5 nanocomposite.

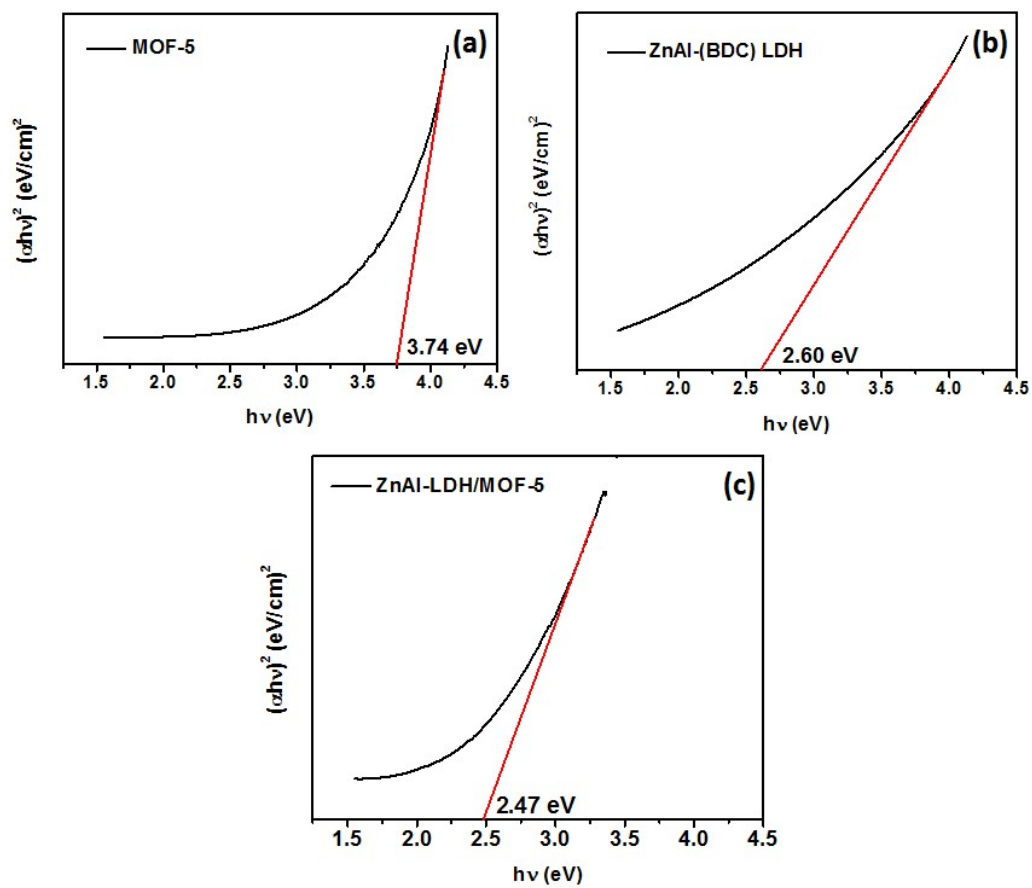

**Fig. S2.** Band gap values calculated for (a) MOF-5, (b) ZnAl-(BDC) LDH, (c) ZnAl-LDH/MOF-5 nanocomposite.

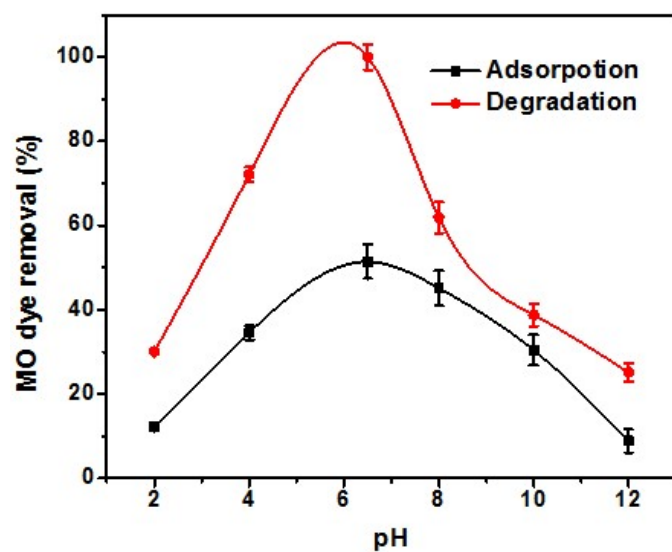

**Fig. S3.** Effect of pH on adsorption and degradation processes of methyl orange (MO) dye in presence of ZnAl-LDH/MOF-5 nanocomposite.

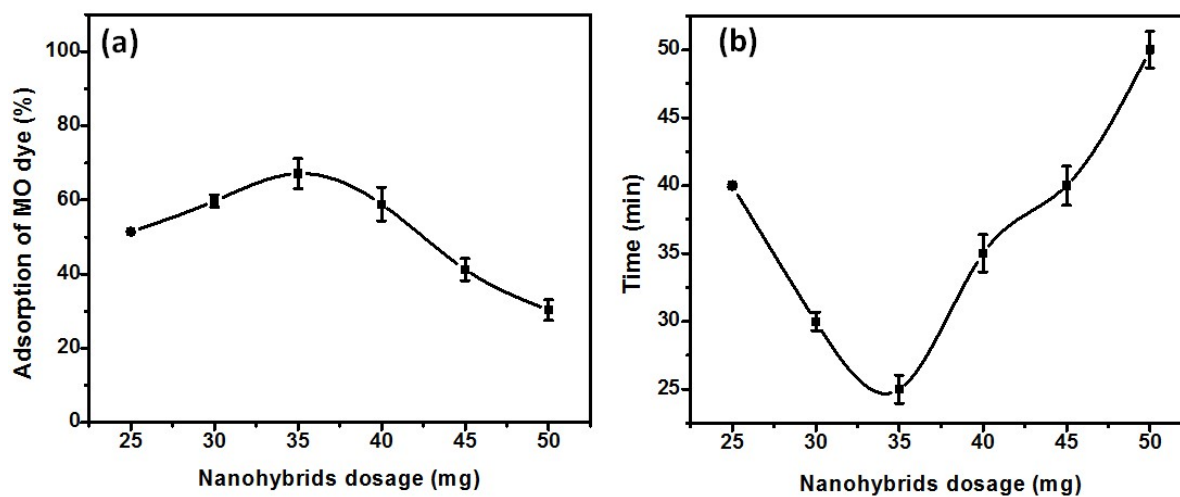

**Fig. S4.** Effect of nanocomposite dosage on (a) adsorption and (b) degradation processes of methyl orange (MO) dye in presence of ZnAl-LDH/MOF-5 nanocomposite.

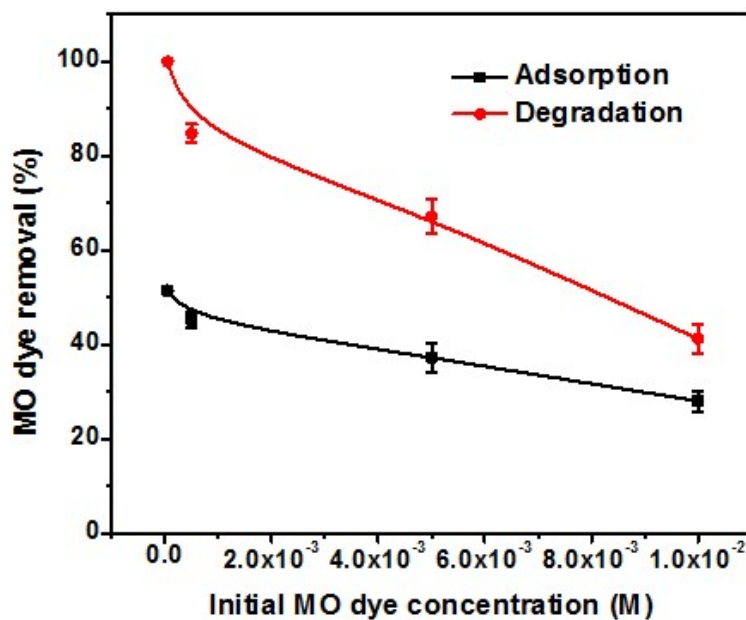

**Fig. S5.** Effect of initial concentration of methyl orange (MO) dye on adsorption and degradation processes in presence of ZnAl-LDH/MOF-5 nanocomposite.

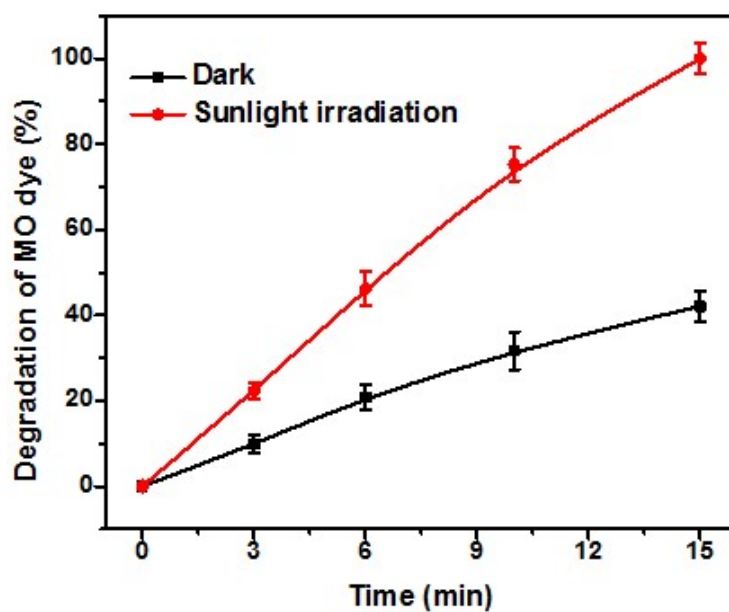

**Fig. S6.** Catalytic methyl orange (MO) dye degradation efficiencies of ZnAl-LDH/MOF-5 nanocomposite in dark and under solar irradiation in presence of H<sub>2</sub>O<sub>2</sub>.

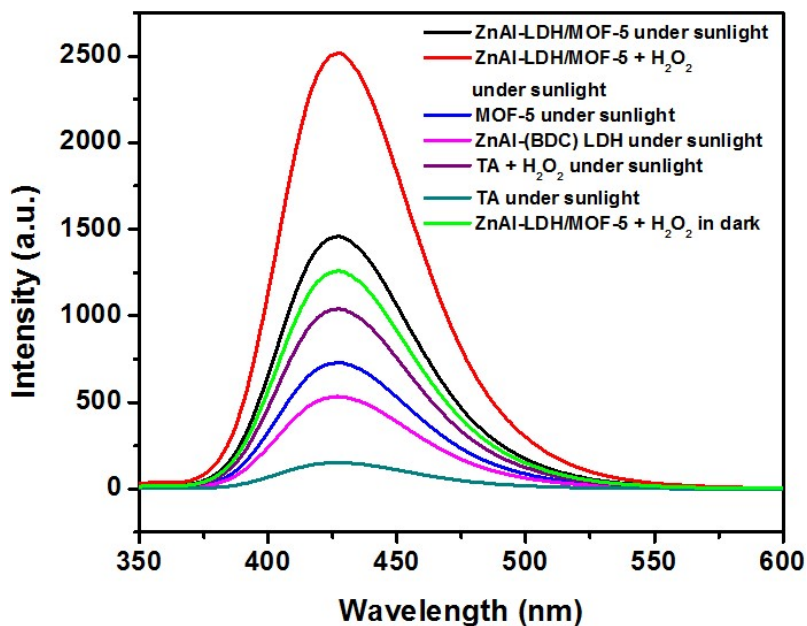

**Fig. S7.** Fluorescence emission spectra of 2-hydroxy-terephthalate, produced during catalysis. (Reaction condition- DST: 0.5 (mM), Catalyst: 100 mgL<sup>-1</sup>, H<sub>2</sub>O<sub>2</sub>: 0.1 (M), Excitation wavelength: 315 nm).

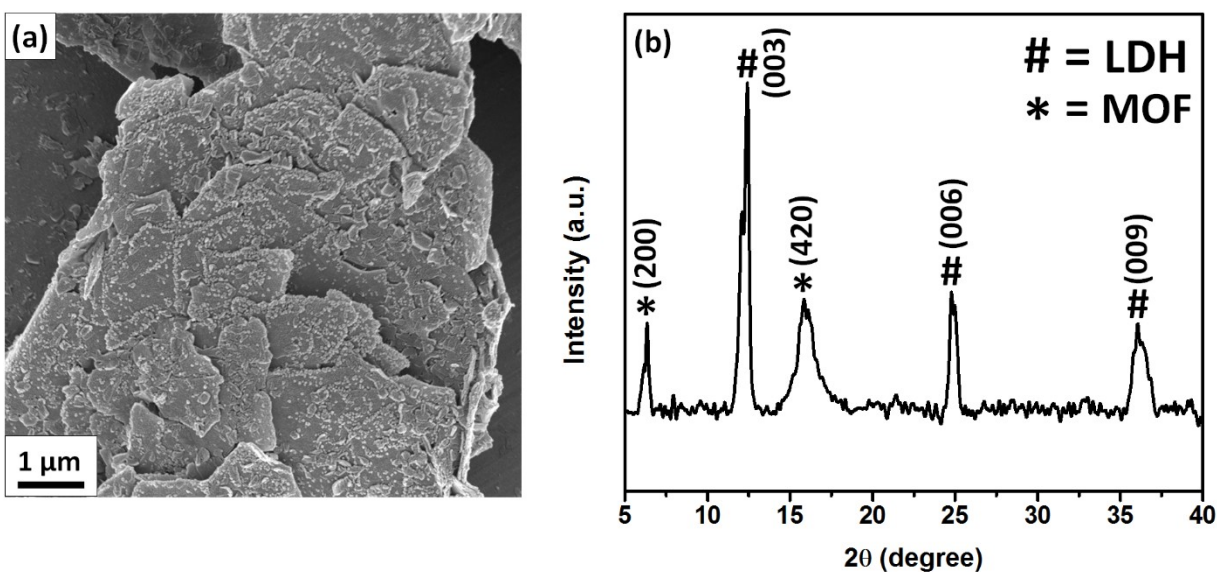

**Fig. S8.** Post-catalytic FESEM image (a) and PXRD pattern (b) of ZnAl-LDH/MOF-5 nanocomposite.
